# Supplementary material
Source: MDPI journal article supplement (https://www.mdpi.com/1999-4907/12/12/1662)
Supplement: s1 [file s1]

Archive with 2 entries (2 files):
- forests-1457822supplementary.pdf
- Video S1 - MR_moisture_content_drying_simulation.mp4
